# Supplementary material for: Prevalence and characteristics of ventricular septal defects in a non‐racehorse equine population (2008‐2019)
Source: PubMed Central journal article supplement — J Vet Intern Med. 2021 Mar 20;35(3):1573–81. doi: 10.1111/jvim.16106 (PMC8163134; doi:10.1111/jvim.16106), 2021-03-20
Supplement: JVIM-35-1573-s001.pdf [file JVIM-35-1573-s001.pdf]

**Supplementary Table 2.** Age, gender, breed, VSD type and other cardiac findings associated with complex congenital heart disease cases. Ao: aorta; ASD: ostium primum atrial septal defect; Arab: Arabian horse; C: Continuous; d: days; G: gelding; M: mare; m: months musc: muscular; NA: not available; HD: holodiastolic; HS: holosystolic; PA/Ao: pulmonary artery/aortic root diameter ratio; PDA: patent ductus arteriosus; pm: perimembranous; PS: pansystolic; PVS: pulmonary valve stenosis; RVH: right ventricular hypertrophy; S: stallion; TOF: tetralogy of Fallot; TV: tricuspid valve; Vmax: maximal velocity; VSD: ventricular septal defect; VTI: velocity time integral; Wbl: warmblood; y: years; \*: concomitant presence of tricuspid valve atresia; \*\*: reversed PDA; \*\*\*: TOF + ASD: referred as pentalogy of Fallot; +: present; -: absent.

| Horse | Age | Gender | Breed           | Murmur (Grade)       |                      | VSD  | ASD | PDA | Dextroposition and override of aortic root | RVH | PVS | PVS flow |            | Increased PA/Ao | TOF  |
|-------|-----|--------|-----------------|----------------------|----------------------|------|-----|-----|--------------------------------------------|-----|-----|----------|------------|-----------------|------|
|       |     |        |                 | Left side            | Right side           |      |     |     |                                            |     |     | VTI (cm) | Vmax (m/s) |                 |      |
| 1*    | 0 d | S      | Wbl             | PS (4/6)<br>HD (3/6) | PS (4/6)<br>HD (3/6) | pm   | +   | +   | +                                          | +   | +   | NA       | NA         | -               | -    |
| 2     | 2 y | S      | Welsh           | PS (NA)<br>HD (NA)   | PS (NA)<br>HD (NA)   | pm   | -   | -   | +                                          | +   | +   | 63       | 3.21       | +               | +    |
| 3     | 7 m | S      | Arab            | PS (5/6)             | PS (5/6)             | pm   | -   | -   | +                                          | +   | +   | 83       | 4.26       | -               | +    |
| 4     | 3 m | M      | Arab            | C                    | C                    | pm   | -   | +   | +                                          | +   | +   | 110      | 3.45       | -               | +    |
| 5     | 9 d | M      | Arab x Friesian | C                    | C                    | musc | -   | *** | -                                          | +   | +   | 26       | 2.8        | +               | -    |
| 6     | 8 y | G      | Wbl             | PS (5/6)             | PS (5/6)             | pm   | +   | -   | +                                          | +   | +   | 238      | 5.41       | +               | +*** |
| 7     | 3 y | S      | Wbl             | NA                   | NA                   | pm   | -   | -   | +                                          | +   | +   | NA       | NA         | +               | +    |
| 8     | 2 y | G      | Wbl             | HS (4/6)<br>HD (2/6) | HS (5/6)             | pm   | -   | -   | +                                          | +   | -   | NA       | NA         | -               | -    |
| 9     | 2 d | M      | Draft horse     | PS (NA)              | HS (NA)              | pm   | -   | -   | +                                          | +   | +   | 31       | 2.66       | -               | +    |
| 10    | 8 y | G      | Wbl             | HS (5/6)             | HS (5/6)             | pm   | -   | -   | +                                          | +   | +   | NA       | NA         | -               | +    |
| 11    | 0 d | M      | Welsh           | HS (NA)              | HS (NA)              | pm   | -   | -   | +                                          | +   | -   | NA       | NA         | -               | -    |
| 12    | 2 y | M      | Wbl             | PS (4/6)             | PS (5/6)             | pm   | -   | -   | +                                          | +   | +   | NA       | NA         | +               | +    |
