# Supplementary material for: Prevalence and characteristics of ventricular septal defects in a non‐racehorse equine population (2008‐2019)
Source: PubMed Central journal article supplement — J Vet Intern Med. 2021 Mar 20;35(3):1573–81. doi: 10.1111/jvim.16106 (PMC8163134; doi:10.1111/jvim.16106), 2021-03-20
Supplement: JVIM-35-1573-s003.pdf [file JVIM-35-1573-s003.pdf]

**Supplementary Table 1.** Age, gender, breed, VSD type and other cardiac findings, history of exercise, follow-up and clinical signs associated with isolated ventricular septal defect cases. AR: aortic regurgitation; Arab: Arabian horse; D: Died; E: Euthanized; G: gelding; inf: infundibular; HD: holodiastolic; HS: holosystolic; m: months M: Mare; musc: muscular; NA: not available; PS: pansystolic; pm: perimembranous; S: stallion; Sx: clinical signs; Thb: Thoroughbred; VSD: ventricular septal defect; Vmax: maximal VSD shunt velocity (m/s); Wbl: warmblood; y: years; +: present; -: absent; <sup>a</sup>: simultaneous presence of a chordae tendineae rupture; <sup>b</sup>: simultaneous presence of an aortic valve tear.

| Horse | Age  | Gender | Breed    | VSD type | VSD Diameter (cm) | Vmax (m/s) | Aortic valve prolapse | Acquired AR | Murmur type (grade)  |            | Exercise before diagnosis | Sx | Follow up |
|-------|------|--------|----------|----------|-------------------|------------|-----------------------|-------------|----------------------|------------|---------------------------|----|-----------|
|       |      |        |          |          |                   |            |                       |             | Left side            | Right side |                           |    |           |
| 1     | 7 y  | G      | Wbl      | pm       | 2.35              | 6.18       | +                     | mild        | HS (4/6)             | HS (4/6)   | +                         | -  | Sport     |
| 2     | 8 y  | G      | Welsh    | pm       | 1.70              | 4.93       | -                     | -           | HS (3/6)             | PS (4/6)   | +                         | -  | Rest      |
| 3     | 18 y | M      | Welsh    | pm       | 1.95              | 5.11       | +                     | -           | HS (4/6)             | PS (4/6)   | +                         | -  | Sport     |
| 4     | 4 y  | M      | Wbl      | pm       | 2.00              | 6.06       | +                     | mild        | HS (4/6)<br>HD (2/6) | HS (5/6)   | +                         | -  | NA        |
| 5     | 4 y  | S      | Draft    | pm       | 2.35              | NA         | +                     | mild        | HS (4/6)             | PS (5/6)   | -                         | -  | NA        |
| 6     | 7 y  | S      | Lusitano | pm       | 2.10              | 4.99       | -                     | trace       | HS (4/6)             | PS (5/6)   | +                         | -  | Sport     |
| 7     | 5 y  | S      | Wbl      | pm       | 2.25              | 5.41       | -                     | moderate    | PS (4/6)             | PS (5/6)   | +                         | -  | E         |
| 8     | 14 y | G      | Wbl      | pm       | 3.60              | 4.19       | +                     | mild        | HS (4/6)             | PS (5/6)   | -                         | +  | Sport     |
| 9     | 5 y  | G      | Wbl      | musc     | 1.05              | 4.18       | -                     | -           | HS (4/6)             | PS (4/6)   | +                         | -  | E         |
| 10    | 8 y  | M      | Wbl      | pm       | 3.20              | 5.12       | +                     | severe      | HS (4/6)             | PS (5/6)   | +                         | -  | NA        |
| 11    | 8 y  | M      | Wbl      | pm       | 1.95              | 3.71       | -                     | -           | HS (3/6)             | HS (1/6)   | +                         | -  | E         |
| 12    | 1 m  | M      | Wbl      | pm       | 0.77              | 6          | -                     | mild        | HS (1/6)             | HS (4/6)   | -                         | -  | E         |
| 13    | 5 y  | M      | Wbl      | pm       | 2.65              | 3.98       | -                     | -           | HS (5/6)             | PS (5/6)   | +                         | +  | E         |
| 14    | 15 y | M      | Thb      | pm       | 3.90              | 4.81       | +                     | mild        | HS (4/6)<br>HD (2/6) | PS (5/6)   | +                         | -  | Sport     |

|    |      |   |         |      |      |      |   |          |                      |                      |   |                |       |
|----|------|---|---------|------|------|------|---|----------|----------------------|----------------------|---|----------------|-------|
| 15 | 11 y | G | Wbl     | pm   | 1.85 | 6.04 | - | -        | HS (4/6)             | PS (4/6)             | + | -              | Sport |
| 16 | 7 y  | G | Pony    | pm   | 1.60 | 5.62 | - | mild     | HS (4/6)             | PS (5/6)             | + | -              | NA    |
| 17 | 3 m  | S | Arab    | pm   | 1.80 | 6.25 | + | mild     | PS (5/6)             | PS (5/6)             | + | -              | D     |
| 18 | 8 y  | M | Wbl     | pm   | 2.20 | 4.17 | - | moderate | PS (5/6)             | HS (4/6)             | + | -              | Rest  |
| 19 | 6 y  | M | Wbl     | pm   | 3.05 | 4.82 | + | mild     | HS (3/6)             | PS (3/6)             | + | -              | E     |
| 20 | 3 y  | S | Draft   | pm   | 3.80 | 5.23 | + | severe   | HS (4/6)             | PS (5/6)             | + | -              | NA    |
| 21 | 4 m  | S | Wbl     | pm   | 1.60 | 3.38 | + | mild     | HS (5/6)             | PS (5/6)             | - | + <sup>a</sup> | Sport |
| 22 | 5 y  | G | Wbl     | pm   | 4.00 | 5.20 | + | moderate | HS (4/6)             | PS (5/6)             | + | -              | Sport |
| 23 | 11 y | G | Pony    | musc | 0.90 | 6.15 | - | -        | HS (4/6)             | PS (4/6)             | + | -              | E     |
| 24 | 5 y  | M | Pony    | inf  | NA   | NA   | + | moderate | HS (4/6)<br>HD (3/6) | PS (4/6)             | + | + <sup>b</sup> | E     |
| 25 | 7 m  | S | Wbl     | pm   | 1.20 | 4.2  | - | mild     | HS (3/6)             | PS (4/6)             | - | -              | NA    |
| 26 | 6 y  | G | Pony    | inf  | 3.60 | 4.23 | + | severe   | HS (3/6)<br>HD (4/6) | HS (3/6)<br>HD (4/6) | + | -              | Sport |
| 27 | 7 y  | G | Wbl     | pm   | 2.50 | 5.05 | + | -        | HS (4/6)             | PS (5/6)             | + | -              | NA    |
| 28 | 4 y  | S | Draft   | pm   | 2.05 | 5.44 | + | mild     | PS (4/6)             | PS (5/6)             | - | -              | E     |
| 29 | 9 m  | M | Wbl     | pm   | 3.10 | 2.78 | - | -        | HS (4/6)             | PS (5/6)             | - | +              | E     |
| 30 | 26 y | G | Wbl     | pm   | 1.50 | 5.40 | + | mild     | HS (3/6)             | PS (5/6)             | + | -              | Sport |
| 31 | 6 y  | S | Wbl     | pm   | 2.20 | 5.05 | - | -        | HS (3/6)             | PS (5/6)             | + | -              | Sport |
| 32 | 6 y  | S | Wbl     | pm   | 2.90 | 5.32 | + | -        | HS (4/6)             | PS (4/6)             | + | -              | NA    |
| 33 | 3 y  | S | Draft   | pm   | 1.35 | 4.30 | - | trace    | HS (4/6)             | PS (5/6)             | + | -              | NA    |
| 34 | 5 y  | M | Pony    | pm   | 1.35 | 5.02 | + | -        | NA                   | NA                   | + | -              | NA    |
| 35 | 7 y  | S | Wbl     | pm   | 3.90 | 5.78 | + | severe   | PS (4/6)             | PS (4/6)             | + | -              | NA    |
| 36 | 2 y  | S | Wbl     | pm   | 2.10 | 5.50 | + | mild     | NA                   | NA                   | - | -              | E     |
| 37 | 2 y  | S | Wbl     | pm   | 3.05 | 4.54 | + | severe   | PS (5/6)<br>PD (5/6) | HS (5/6)             | - | +              | E     |
| 38 | 3 y  | G | Wbl     | inf  | 1.75 | 4.48 | - | -        | PS (5/6)             | PS (4/6)             | - | -              | NA    |
| 39 | 4 y  | S | Draft   | inf  | NA   | 3.36 | - | mild     | PS (5/6)             | PS (4/6)             | + | -              | NA    |
| 40 | 3 y  | M | Trotter | pm   | 1.05 | 4.83 | - | mild     | HS (5/6)             | PS (3/6)             | - | -              | NA    |
| 41 | 14 y | M | Wbl     | pm   | 1.70 | 4.86 | - | -        | HS (3/6)             | PS (5/6)             | + | -              | NA    |
| 42 | 3 y  | S | Pony    | pm   | 0.95 | 5.58 | + | moderate | HS (3/6)<br>HD (3/6) | PS (5/6)             | - | -              | NA    |
